# Supplementary material for: Los traders cambian de estrategia
Source: Royal Society of Chemistry journal article supplement (doi:10.1039/d4cp00459k), 2012-01-01
Supplement: d4cp00459k1.pdf [file d4cp00459k1.pdf]

## 1 Supporting Information

### 2 Experimental Section

3 *Materials:* Sodium citrate tribasic dihydrate ( $\text{HOC}(\text{COONa})(\text{CH}_2\text{COONa})_2 \cdot 2\text{H}_2\text{O}$ ),  
4 NaF, Urea ( $\text{NH}_2\text{CONH}_2$ ),  $\text{Yb}(\text{NO}_3)_3$ ,  $\text{Er}(\text{NO}_3)_3 \cdot 6\text{H}_2\text{O}$ ,  $\text{Tm}(\text{NO}_3)_3 \cdot 6\text{H}_2\text{O}$ , and  
5  $\text{Co}(\text{NO}_3)_2 \cdot 6\text{H}_2\text{O}$  were purchased from Shanghai Titan Scientific Co., Ltd.  
6  $\text{Y}(\text{NO}_3)_3 \cdot 6\text{H}_2\text{O}$  was purchased from Sinopharm Chemical Reagent Co., Ltd. Ethanol  
7 absolute was taken from Shanghai Lingfeng Chemical Reagent Co., Ltd. Deionized  
8 water was obtained from a Milli-Q system (Tondino Scientific (Shanghai) Co., Ltd).  
9 All chemicals are analytical grade and were used as received without any further  
10 purification.

11 *Synthesis of  $\text{Co}^{2+}$  doped  $\text{NaYF}_4$ : Yb/Er/Tm particles:*  $\text{Co}^{2+}$  doped  $\text{NaYF}_4$ : Yb/Er/Tm  
12 particles were synthesized by the previous reported hydrothermal method.<sup>1</sup> Typically,  
13  $(0.8-x)$  mmol  $\text{Y}(\text{NO}_3)_3 \cdot 6\text{H}_2\text{O}$ , 0.18 mmol  $\text{Yb}(\text{NO}_3)_3$ , 0.02 mmol  $\text{Er}(\text{NO}_3)_3 \cdot 6\text{H}_2\text{O}$ , 0.02  
14 mmol  $\text{Tm}(\text{NO}_3)_3 \cdot 6\text{H}_2\text{O}$ , and  $x$  mmol  $\text{Co}(\text{NO}_3)_2 \cdot 6\text{H}_2\text{O}$  ( $x=0, 0.05, 0.15, 0.25$ ) were  
15 added to an aqueous solution of Sodium citrate tribasic dihydrate (0.5 mmol in 15 mL  
16 deionized water) under thorough stirring. The mixed solution was kept stirring for 1 h.  
17 Then, 4 mmol NaF and 20 mmol  $\text{NH}_2\text{CONH}_2$  were slowly added into the solution.  
18 The mixed solution was kept stirring for another 1 h. After stirred evenly, the mixture  
19 solution was transferred to a 100 mL Teflon-lined stainless autoclave, thermally  
20 heated at 453 K for 12 h, and then cooled to room temperature. The obtained products  
21 were washed and centrifuged with deionized water and ethanol three times to remove

22 impurities and then dried at 353 K for 12 h in a vacuum drying oven. The final  
23 products obtained were named NaYF<sub>4</sub>: Yb/Er/Tm/Co (18/2/2/x mol%, x=0, 5, 15, 25).  
24 *Preparation of upconversion luminescent coating:* The prepared NaYF<sub>4</sub>:  
25 Yb/Er/Tm/Co (18/2/2/x mol%, x=0, 5, 15, 25) samples were mixed with ethanol  
26 according to the ratio of solid to liquid 1:100, and ultrasonic for 1 h to disperse evenly.  
27 The upconversion luminescent coating was obtained by dipping the evenly mixed  
28 solution with a non-woven cloth and coating it on a clean and highly transparent glass  
29 substrate (transmittance greater than 95%).  
30 *Characterizations:* The crystalline phases were characterized by X-ray diffraction  
31 (XRD) using a high-resolution powder X-ray diffractometer (D8 Advance) with Cu  
32 K $\alpha$  radiation. The morphologies of the samples were obtained by a high-resolution  
33 field emission scanning electron microscope (SEM). The upconversion emission  
34 analysis was measured by a low temperature absorption spectrometer (FLS-980). X-  
35 ray photoelectron spectroscopy (XPS) was measured by a ESCALab250 spectroscopy  
36 instrument. The optical absorption performance was measured by a UV-Vis-IR  
37 diffuse reflectance spectroscopy (Perkin Elmer, model LAMBDA 1050). The  
38 chemical structures were measured by an infrared (IR) spectroscopy (Spotlight400).  
39 The light transmittance was tested by a transmissivity test apparatus (SDR851). The J-  
40 V curves of photovoltaic cell were measured by a solar simulator (ProMoSim evo3,  
41 standard solar radiation AM 1.5G, 100 mW/cm<sup>2</sup>).

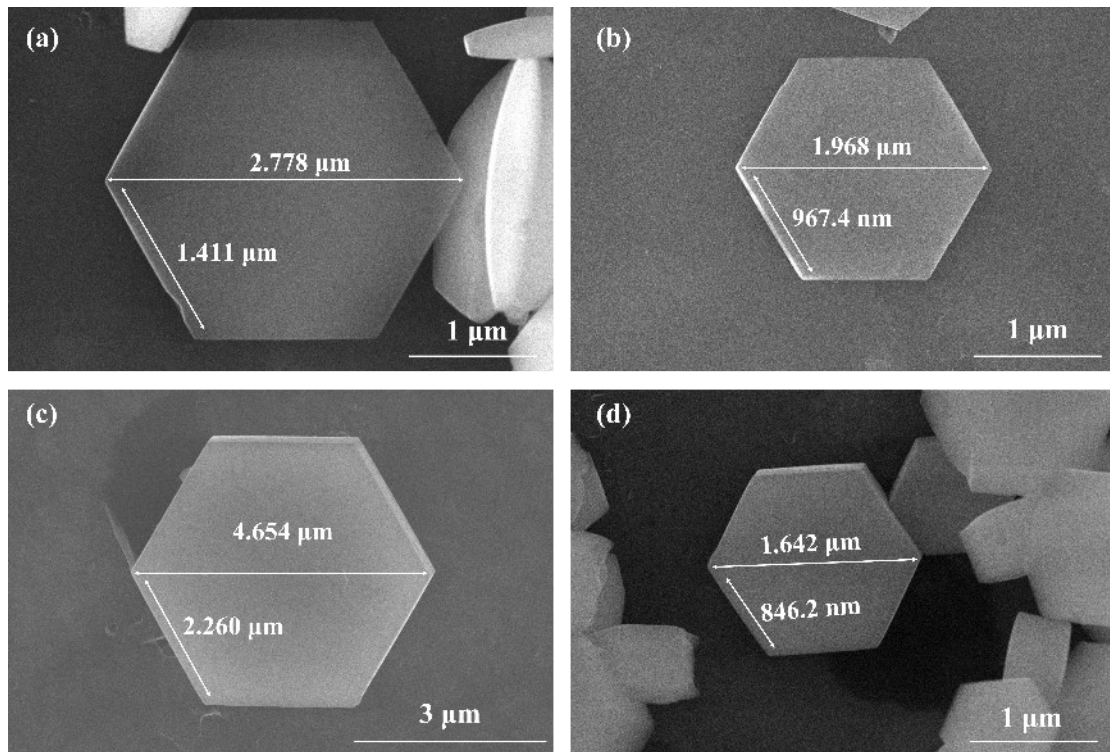

42

43 **Figure S1.** SEM images of diameter and side length of  $\text{NaYF}_4: \text{Yb/Er/Tm/Co}$

44 (18/2/2/x mol%,  $x=0, 5, 15, 25$ ) hexagonal crystals: (a)  $x=0$ , (b)  $x=5$ , (c)  $x=15$  and (d)

45  $x=25$ .

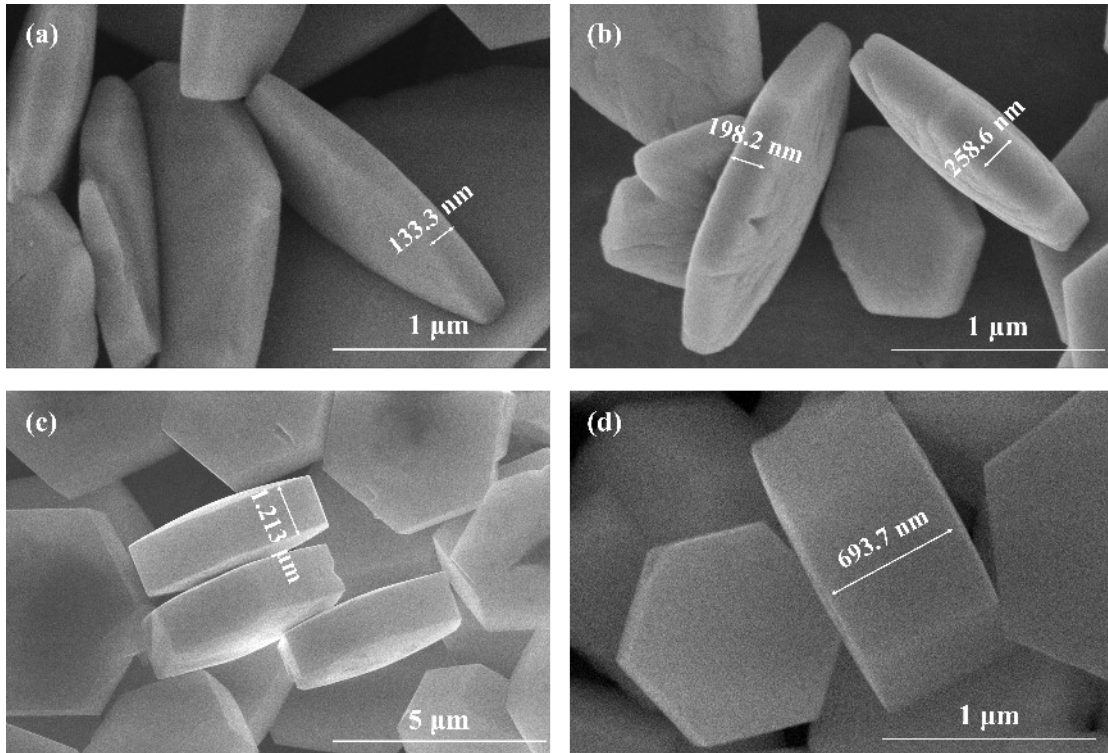

46

47 **Figure S2.** SEM images of thickness of NaYF<sub>4</sub>: Yb/Er/Tm/Co (18/2/2/x mol%, x=0,

48 5, 15, 25) hexagonal crystals: (a) x=0, (b) x=5, (c) x=15 and (d) x=25.

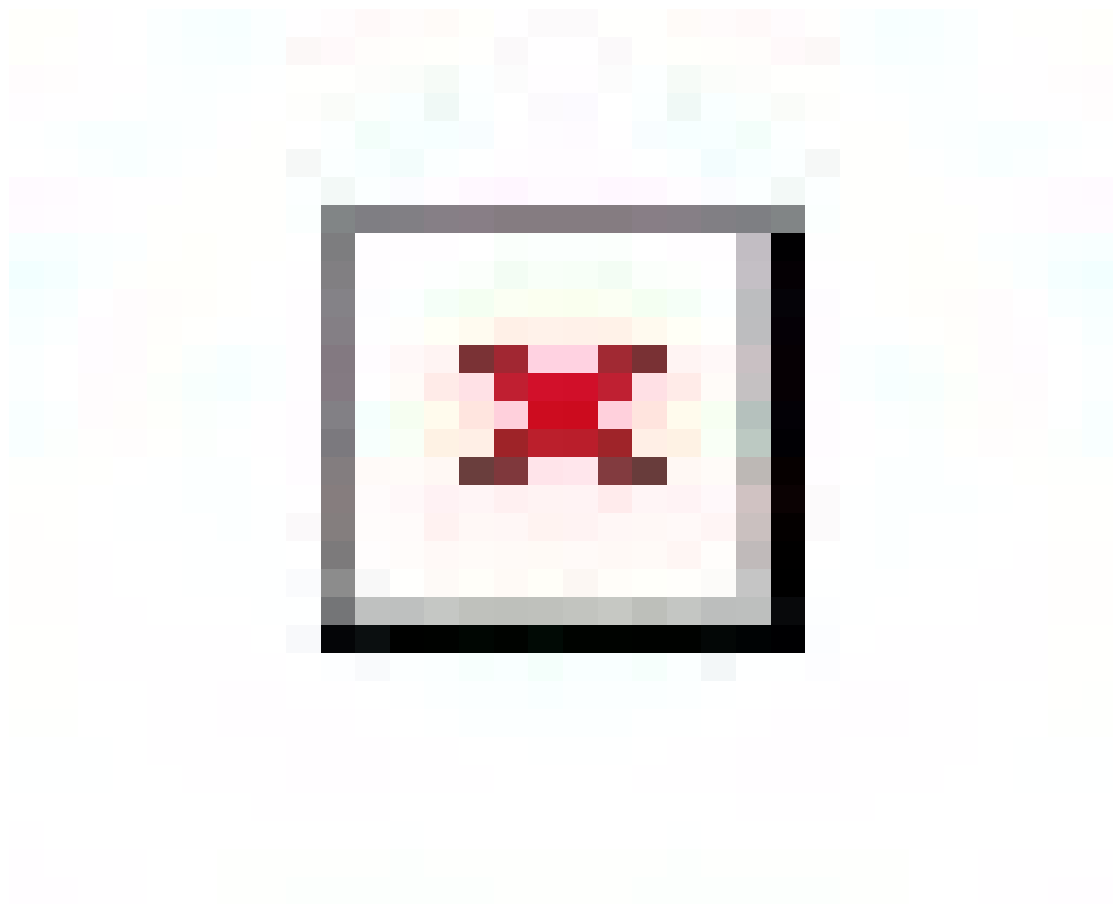

49

50 **Figure S3.** XPS spectra of NaYF<sub>4</sub>: Yb/Er/Tm/Co (18/2/2/x mol%, x=0, 5, 15, 25)

51 hexagonal crystals: (a) Co 2p, (b) Na 1s, (c) Y 3d and (d) F 1s.

52 **Table S1**

53 The XPS measured actual molar ratios of prepared NaYF<sub>4</sub>: Yb/Er/Tm/Co (18/2/2/x  
 54 mol%, x=0, 5, 15, 25) samples.

| Element | Atomic concentration percentage |                     |                      |                      |
|---------|---------------------------------|---------------------|----------------------|----------------------|
| symbol  | 0% Co <sup>2+</sup>             | 5% Co <sup>2+</sup> | 15% Co <sup>2+</sup> | 25% Co <sup>2+</sup> |
| C       | 16.1                            | 14.13               | 19.3                 | 22.17                |
| O       | 9.02                            | 8.23                | 9.02                 | 10.03                |
| Y       | 14.01                           | 13.92               | 12.82                | 11.09                |
| F       | 50.52                           | 53.33               | 49.18                | 46.89                |
| Na      | 9.8                             | 9.75                | 8.55                 | 8.26                 |
| Er      | 0.23                            | 0.26                | 0.16                 | 0.17                 |
| Tm      | 0.02                            | 0.01                | 0.03                 | 0.03                 |
| Yb      | 0.29                            | 0.32                | 0.32                 | 0.32                 |
| Co      | —                               | 0.05                | 0.63                 | 1.03                 |

55

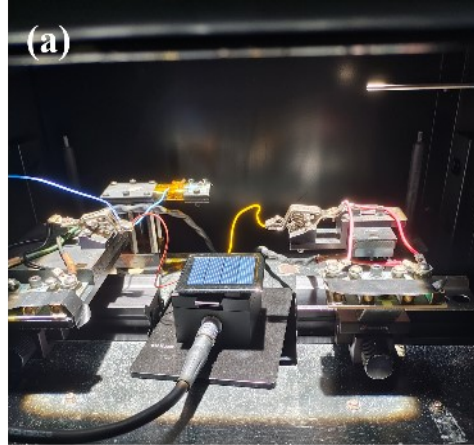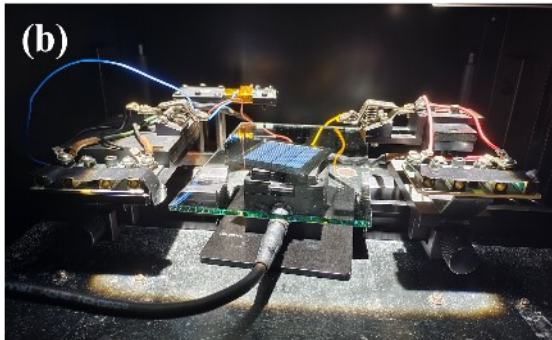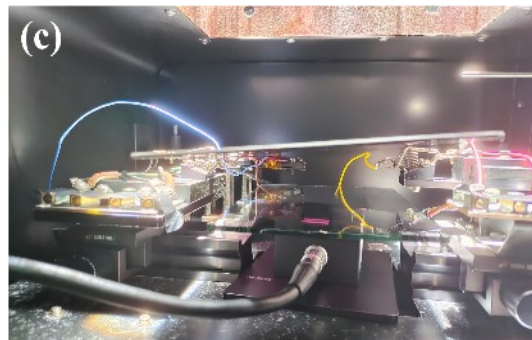

56

57 **Figure S4.** (a) Photovoltaic cell works under an intensity of sunlight; (b) Photovoltaic  
58 cell coated with the NaYF<sub>4</sub>: Yb/Er/Tm/Co (18/2/2/x mol%, x=0, 5, 15, 25) samples  
59 works under 1 standard solar intensity radiation (AM1.5G, 100 mW/cm<sup>2</sup>); (b)  
60 Photovoltaic cell coated with the NaYF<sub>4</sub>: Yb/Er/Tm/Co (18/2/2/x mol%, x=0, 5, 15,  
61 25) samples works under IR light (a filter was used to remove ultraviolet and visible  
62 light from solar radiation, photon wavelength  $\geq 760\text{nm}$ ).

63 **Table S2**

64 List of relevant studies on upconversion materials enhancing the efficiency of solar  
65 cell

| <b>Materials</b>                                                                           | <b>Efficiency increase (%)</b> | <b>References</b>         |
|--------------------------------------------------------------------------------------------|--------------------------------|---------------------------|
| 5% Co <sup>2+</sup> doped NaYF <sub>4</sub> : Yb/Er/Tm                                     | 2.08                           | This work                 |
| NaYF <sub>4</sub> :Er <sup>3+</sup> , Yb <sup>3+</sup> @SiO <sub>2</sub> @TiO <sub>2</sub> | 2.17                           | Liang et al. <sup>2</sup> |
| β-NaYF <sub>4</sub> : Yb <sup>3+</sup> , Er <sup>3+</sup>                                  | 1.49                           | Roh et al. <sup>3</sup>   |
| NaYF <sub>4</sub> : Yb <sup>3+</sup> , Tm <sup>3+</sup>                                    | 1.24                           | Liang et al. <sup>4</sup> |
| TiO <sub>2</sub> : (Er <sup>3+</sup> , Yb <sup>3+</sup> )                                  | 1.72                           | Xie et al. <sup>5</sup>   |

66



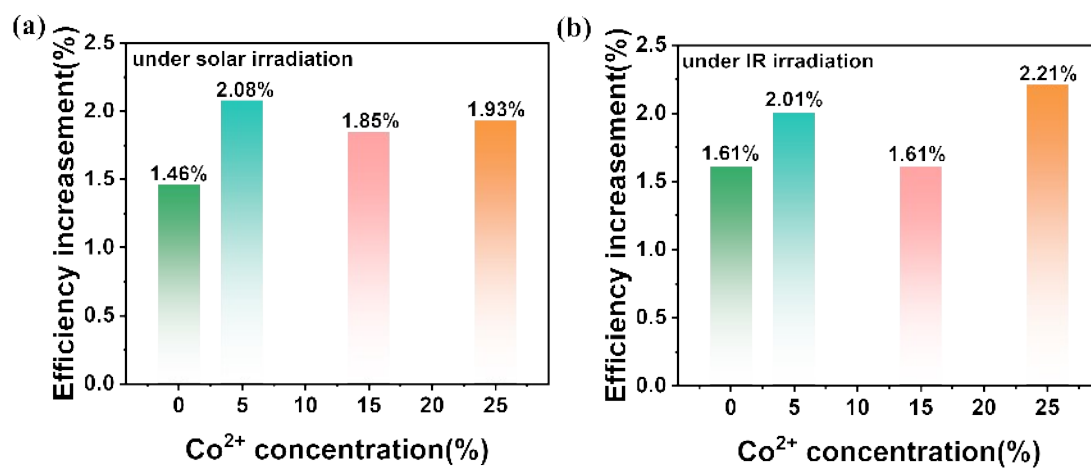

67

68 **Figure S5.** Efficiency increase of different  $\text{Co}^{2+}$  doped  $\text{NaYF}_4: \text{Yb/Er/Tm}$

69 upconversion luminescent coatings on photovoltaic cell under solar irradiation (a) and

70 under IR irradiation (b).

## 71 References

- 72 1. Z. Xu, M. Quintanilla, F. Vetrone, A. O. Govorov, M. Chaker and D. Ma,  
73 *Advanced Functional Materials*, 2015, **25**, 2950-2960.
- 74 2. L. Liang, Y. Liu, C. Bu, K. Guo, W. Sun, N. Huang, T. Peng, B. Sebo, M. Pan,  
75 W. Liu, S. Guo and X. Z. Zhao, *Adv Mater*, 2013, **25**, 2174-2180.
- 76 3. J. Roh, H. Yu and J. Jang, *ACS Appl Mater Interfaces*, 2016, **8**, 19847-19852.
- 77 4. J. Liang, H. Gao, M. Yi, W. Shi, Y. Liu, Z. Zhang and Y. Mao,  
78 *Electrochimica Acta*, 2018, **261**, 14-22.
- 79 5. G. Xie, J. Lin, J. Wu, Z. Lan, Q. Li, Y. Xiao, G. Yue, H. Yue and M. Huang,  
80 *Chinese Science Bulletin*, 2011, **56**, 96-101.
